# Supplementary material for: BMI, reproductive factors, and breast cancer molecular subtypes: A case-control study and meta-analysis
Source: PubMed Central journal article supplement — J Epidemiol. 2016 Dec 9;27(4):143–51. doi: 10.1016/j.je.2016.05.002 (PMC5376312; doi:10.1016/j.je.2016.05.002), 2016-12-09
Supplement: mmc1.pdf [file mmc1.pdf]

**eTable 1. Results of sensitivity analysis**

| Risk factor                                | Subtype         | Ref. <sup>a</sup>                   | OR (95% CI) <sub>before</sub> <sup>b</sup> | <i>P</i> <sub>h1</sub> <sup>c</sup> | OR (95% CI) <sub>after</sub> <sup>d</sup> | <i>P</i> <sub>h2</sub> <sup>e</sup> |
|--------------------------------------------|-----------------|-------------------------------------|--------------------------------------------|-------------------------------------|-------------------------------------------|-------------------------------------|
| BMI, 18.5-24.9 vs. <18.5 kg/m <sup>2</sup> | luminal         | Kawai et al. 2012. <sup>26</sup>    | 1.20 (0.96-1.49)                           | 0.68                                | 1.25 (0.95-1.64)                          | 0.46                                |
|                                            | ER-PR-          | Kawai et al. 2012. <sup>26</sup>    | 1.43 (1.00-2.05)                           | 0.57                                | 1.55 (0.99-2.45)                          | 0.37                                |
| BMI, ≥25 vs. <18.5 kg/m <sup>2</sup>       | luminal         | Kawai et al. 2012. <sup>26</sup>    | 1.75 (1.30-2.35)                           | 0.22                                | 2.02 (1.49-2.75)                          | 0.47                                |
|                                            | ER-PR-          | Kawai et al. 2012. <sup>26</sup>    | 1.95 (1.04-3.65)                           | 0.07                                | 2.63 (1.61-4.30)                          | 0.23                                |
| Menopausal age                             | luminal         | Bao et al. 2011. <sup>18</sup>      | 1.15 (1.00-1.32)                           | 0.26                                | 1.06 (0.86-1.30)                          | 0.22                                |
|                                            | ER-PR-          | Islam et al. 2012. <sup>25</sup>    | 1.19 (1.00-1.43)                           | 0.06                                | 1.43 (1.13-1.81)                          | 0.77                                |
| Age at menarche                            | luminal         | Kawai et al. 2012. <sup>26</sup>    | 1.39 (1.23-1.57)                           | 0.28                                | 1.35 (1.15-1.58)                          | 0.17                                |
|                                            | Her2-enriched   | Islam et al. 2012. <sup>25</sup>    | 1.20 (0.91-1.58)                           | 0.11                                | 1.04 (0.55-1.96)                          | 0.17                                |
|                                            | Triple-negative | Present study                       | 1.28 (0.94-1.73)                           | 0.76                                | 1.35 (0.89-2.04)                          | 0.54                                |
|                                            | ER-PR-          | Kawai et al. 2012. <sup>26</sup>    | 1.20 (0.91-1.58)                           | 0.11                                | 1.08 (0.78-1.51)                          | 0.19                                |
| Parity                                     | luminal         | Islam et al. 2012. <sup>25</sup>    | 1.26 (1.11-1.44)                           | 0.14                                | 1.36 (1.18-1.58)                          | 0.43                                |
|                                            | Her2-enriched   | Miyagawa et al. 2013. <sup>27</sup> | 1.02 (0.70-1.47)                           | 0.19                                | 0.81 (0.46-1.44)                          | 0.12                                |
|                                            | Triple-negative | Miyagawa et al. 2013. <sup>27</sup> | 1.34 (0.96-1.85)                           | 0.66                                | 1.40 (0.93-2.10)                          | 0.49                                |
| Age at first live birth                    | ER-PR-          | Miyagawa et al. 2013. <sup>27</sup> | 1.03 (0.84-1.26)                           | 0.28                                | 0.96 (0.76-1.22)                          | 0.26                                |
|                                            | luminal         | Bao et al. 2011. <sup>18</sup>      | 1.14 (0.86-1.52)                           | <0.0001                             | 1.09 (0.76-1.57)                          | <0.0001                             |
|                                            | Her2-enriched   | Xing et al. 2009. <sup>19</sup>     | 0.93 (0.56-1.56)                           | <0.0001                             | 1.14 (0.80-1.64)                          | 0.11                                |
|                                            | Triple-negative | Xing et al. 2009. <sup>19</sup>     | 0.80 (0.56-1.14)                           | <0.0001                             | 0.98 (0.78-1.24)                          | 0.20                                |
| Breastfeeding                              | ER-PR-          | Bao et al. 2011. <sup>18</sup>      | 0.83 (0.62-1.10)                           | <0.0001                             | 0.76 (0.56-1.04)                          | 0.0005                              |
|                                            | luminal         | Bao et al. 2011. <sup>18</sup>      | 1.35 (1.05-1.74)                           | <0.0001                             | 1.41 (1.00-1.99)                          | 0.0004                              |
|                                            | Her2-enriched   | Islam et al. 2012. <sup>25</sup>    | 1.97 (1.39-2.80)                           | 0.23                                | 2.21 (1.37-3.56)                          | 0.20                                |
|                                            | Triple-negative | Xing et al. 2009. <sup>19</sup>     | 1.85 (1.06-3.21)                           | 0.02                                | 1.69 (0.67-4.31)                          | 0.01                                |
|                                            | ER-PR-          | Bao et al. 2011. <sup>18</sup>      | 1.74 (1.41-2.15)                           | 0.001                               | 1.57 (1.30-1.91)                          | 0.005                               |

BMI, body mass index; CI, confidence interval; OR, odds ratio.

<sup>a</sup> Study with the largest weight

<sup>b</sup> Pooled OR with 95% CI before dropping a study

<sup>c</sup> Heterogeneity among studies before dropping a study

<sup>d</sup> Pooled OR with 95% CI after dropping a study

<sup>e</sup> Heterogeneity among studies after dropping a study

**eTable 2.** Results of Egger's test for publication bias

| Risk factor                                | Subtype         | $\alpha$ | t       | P     |
|--------------------------------------------|-----------------|----------|---------|-------|
| BMI, 18.5–24.9 vs. <18.5 kg/m <sup>2</sup> | Luminal         | –3.705   | –10.817 | 0.060 |
|                                            | ER–PR–          | –2.871   | –2.015  | 0.293 |
| BMI, $\geq 25$ vs. <18.5 kg/m <sup>2</sup> | Luminal         | –2.783   | –5.968  | 0.106 |
|                                            | ER–PR–          | –5.195   | –1.666  | 0.344 |
| Menopausal age                             | Luminal         | 0.127    | 0.235   | 0.853 |
|                                            | ER–PR–          | –1.279   | –1.222  | 0.437 |
| Age at menarche                            | Luminal         | 0.021    | 0.073   | 0.948 |
|                                            | HER2-enriched   | –1.079   | –0.583  | 0.664 |
|                                            | Triple-negative | –0.516   | –2.494  | 0.243 |
|                                            | ER–PR–          | –0.109   | –0.162  | 0.886 |
| Parity                                     | Luminal         | –0.134   | –0.466  | 0.666 |
|                                            | HER2-enriched   | –0.784   | –0.631  | 0.642 |
|                                            | Triple-negative | 0.323    | 0.553   | 0.636 |
|                                            | ER–PR–          | –0.661   | –1.354  | 0.247 |
| Age at first live birth                    | Luminal         | 0.129    | 0.136   | 0.900 |
|                                            | HER2-enriched   | –1.849   | –2.923  | 0.210 |
|                                            | Triple-negative | –0.072   | –0.132  | 0.917 |
|                                            | ER–PR–          | –0.069   | –0.109  | 0.920 |
| Breastfeeding                              | Luminal         | 0.346    | 0.528   | 0.634 |
|                                            | HER2-enriched   | 1.362    | 1.874   | 0.312 |
|                                            | Triple-negative | –0.825   | –0.190  | 0.880 |
|                                            | ER–PR–          | –0.006   | –0.007  | 0.995 |

BMI, body mass index.
